# Supplementary material for: 2,2′-Bipyridine-4,4′-dicarboxylic acid ligand engineered CsPbBr3 perovskite nanocrystals for enhanced photoluminescence quantum yield with stable display applications
Source: Royal Society of Chemistry journal article supplement (doi:10.1039/d4ma00124a), 2024-01-01
Supplement: d4ma00124a1.pdf [file d4ma00124a1.pdf]

## **Supporting Information**

### **2,2'-bipyridine-4,4'-dicarboxylic acid ligand engineered CsPbBr<sub>3</sub> perovskite nanocrystals for enhanced photoluminescence quantum yield with stable display application**

Ankit Kumar<sup>a</sup>, Sukanya Ghosh<sup>a</sup>, Ankush Saini<sup>b</sup>, Sumit Kumar<sup>a</sup>, Monojit Bag <sup>\*b</sup> Prasenjit Kar<sup>\*a</sup>

<sup>a</sup>Department of Chemistry, Indian Institute of Technology Roorkee, Roorkee, Uttarakhand, India

<sup>b</sup>Department of Physics, Indian Institute of Technology Roorkee, Roorkee, Uttarakhand, India

E-mail: kar.prasen@gmail.com, prasenjit.kar@cy.iitr.ac.in, monojit.bag@ph.iitr.ac.in

| <b>S. No.</b> | <b>Contents</b>                                                                                                                              | <b>Page no.</b> |
|---------------|----------------------------------------------------------------------------------------------------------------------------------------------|-----------------|
| 1.            | Instrumentation details                                                                                                                      | S3-S4           |
| 2.            | FTIR spectra of BPY ( <b>Figure S1</b> )                                                                                                     | S5              |
| 3.            | <sup>1</sup> H NMR spectrum of BPY ( <b>Figure S2</b> )                                                                                      | S5              |
| 4.            | SEM images, elemental mapping, EDX spectra of pristine CsPbBr <sub>3</sub> PNCs and BPY-CsPbBr <sub>3</sub> PNCs ( <b>Figure S3 and S4</b> ) | S6              |
| 5.            | PLQY spectrum of BPY-CsPbBr <sub>3</sub> PNCs ( <b>Figure S5</b> )                                                                           | S7              |
| 6.            | FTIR spectra of BPY ( <b>Figure S6</b> )                                                                                                     | S7              |
| 7.            | XPS survey scan of pristine CsPbBr <sub>3</sub> PNCs and BPY-CsPbBr <sub>3</sub> PNCs ( <b>Figure S7</b> )                                   | S8              |
| 8.            | Photograph of down-converted LED under daylight ( <b>Figure S8</b> )                                                                         | S8              |
| 9.            | List of bidentate ligands ( <b>Table S1</b> )                                                                                                | S9              |

## **Instrumentation details**

### **1. Absorption and Emission (UV and PL) studies**

Optical studies, i.e., absorption and emission spectra were recorded at room temperature. UV-vis absorption spectra were recorded on Shimadzu UV-vis 1800 spectrophotometer in the 200-800 nm range. Photoluminescence spectra were collected by using Cary Eclipse Fluorescence Spectrophotometer.

### **2. Fourier Transform Infrared Spectroscopy (FTIR) studies**

Thermo Scientific Nicolet 6700 spectrometer was used to record FTIR spectra. The spectra were collected between 400 to 4000  $\text{cm}^{-1}$  by using KBr pellet-making technique.

### **3. X-ray Diffraction (XRD)**

Powder XRD was performed on Rigaku having a target Cu  $K\alpha$  with radiation of 1.54 Å and an accelerating voltage of 9 kW. The sample was scanned in the range of 10° to 50°. The sample was prepared in the form of a thin film by using the drop-casting method on the silica glass slide.

### **4. Field Emission Scanning Electron Microscopy (FE-SEM)**

FE-SEM Gemini 300 instrument was used to collect morphological images, Energy Dispersive X-ray (EDX), of corresponding elements. The drop-casting method was used to prepare a thin film of sample on a silica glass slide.

### **5. Transmission Electron Microscopy (TEM)**

TEM study was performed on FEI TECHNAI G2 20 S-TWIN. A drop of diluted samples was deposited on a carbon-coated copper grid.

## **6. X-ray Photoelectron spectroscopy (XPS)**

Surface analysis of the thin film has been studied on XPS with model no. PHI 5000 Versa Probe III.

## **7. Photoluminescence Quantum Yield (PLQY)**

Absolute quantum yield was measured directly by using Edinburgh instruments FLS 980.

## **8. $^1\text{H}$ Nuclear magnetic resonance ( $^1\text{H}$ NMR)**

$^1\text{H}$  NMR spectra were recorded in DMSO  $d_6$  on the Bruker instrument with model AVANCE III 500 MHz.

## **9. Time-correlated single-photon counting (TCSPC) studies**

Fluorescence lifetime decay was measured by using Edinburgh instruments FLS 1000.

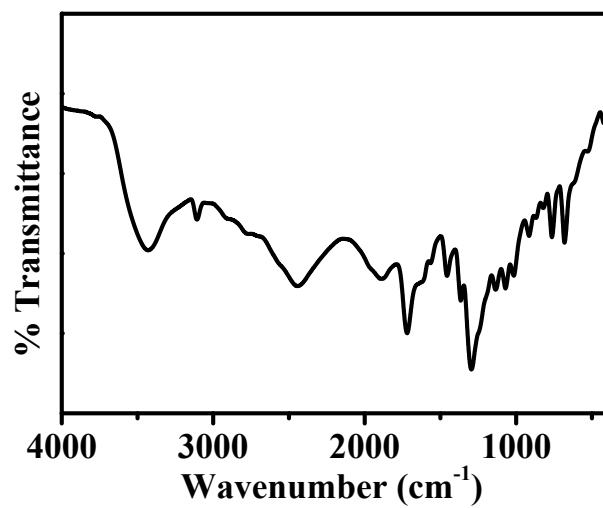

**Figure S1.** FTIR spectra of BPY.

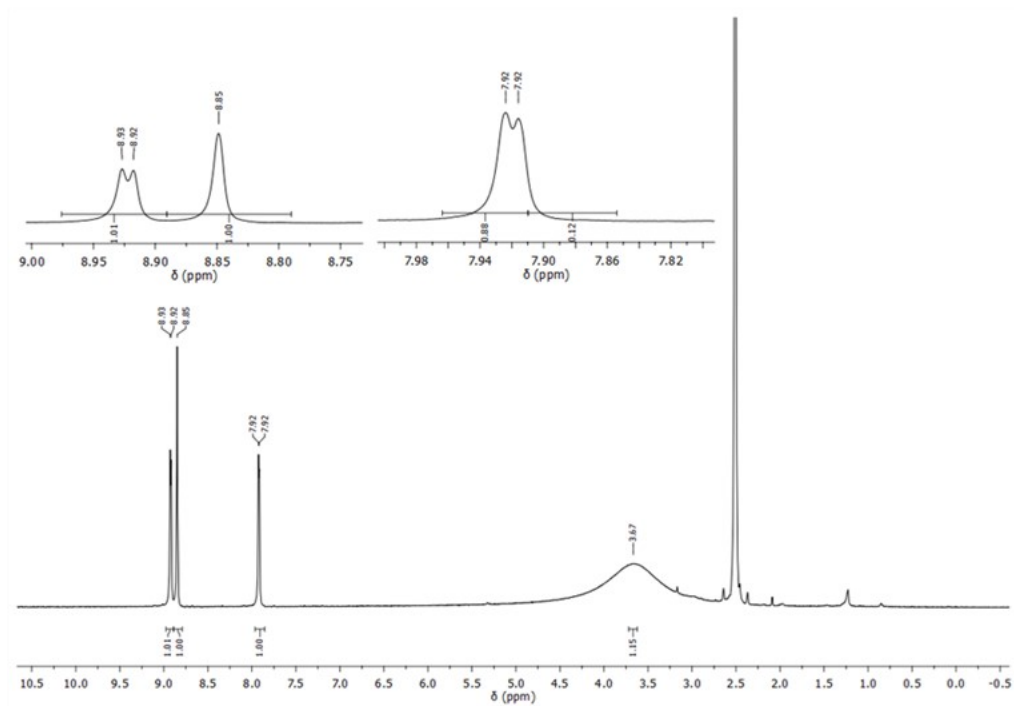

**Figure S2.**  $^1\text{H}$  NMR spectrum of BPY.

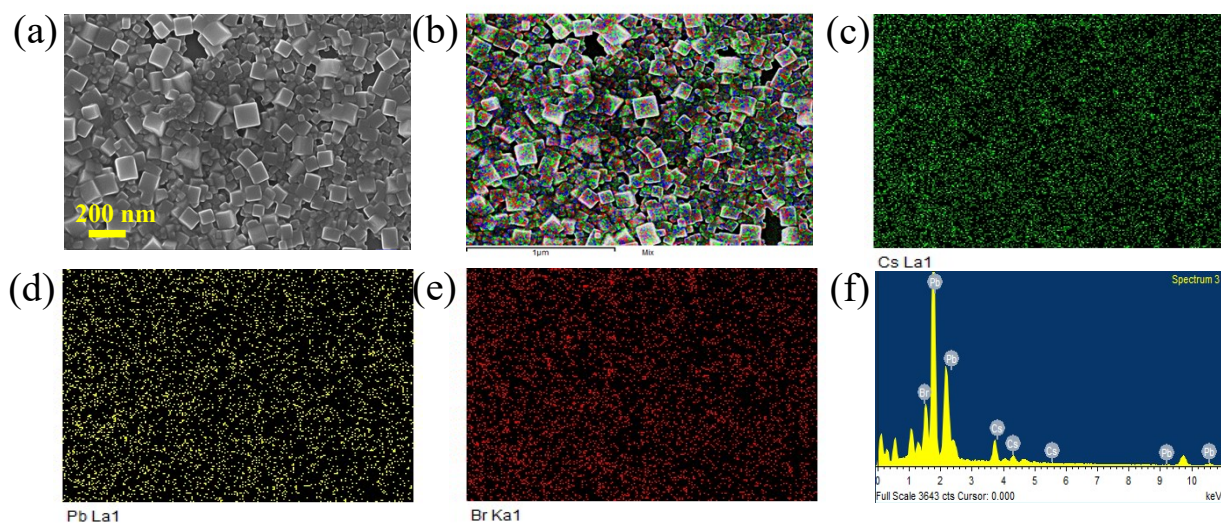

**Figure S3.** (a) SEM image; (b-e) elemental mapping; (f) EDX spectra of pristine CsPbBr<sub>3</sub> PNCs.

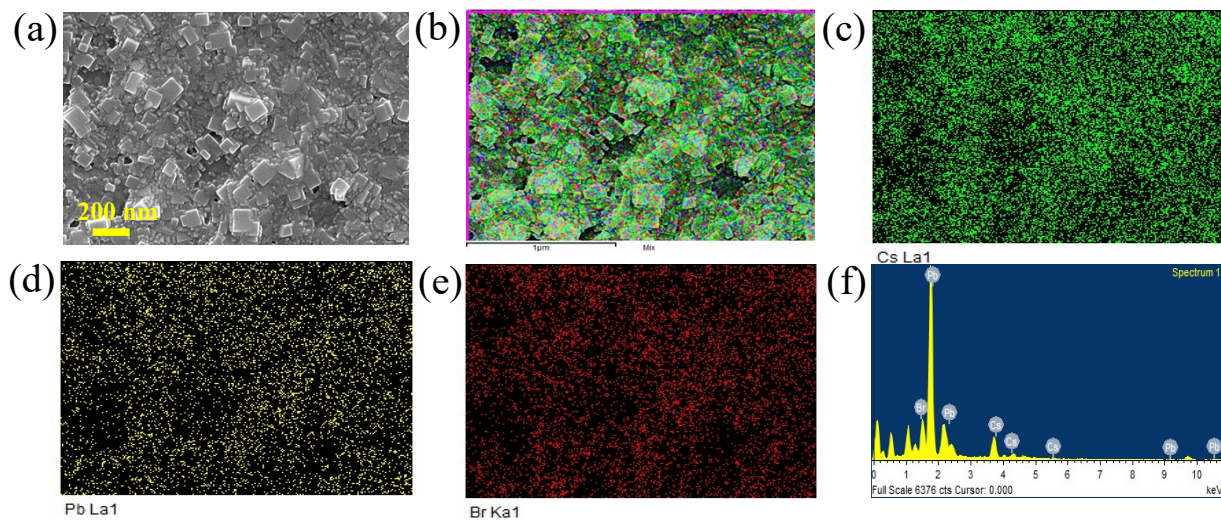

**Figure S4.** (a) SEM image; (b-e) elemental mapping; (f) EDX spectra of BPY-CsPbBr<sub>3</sub> PNCs.

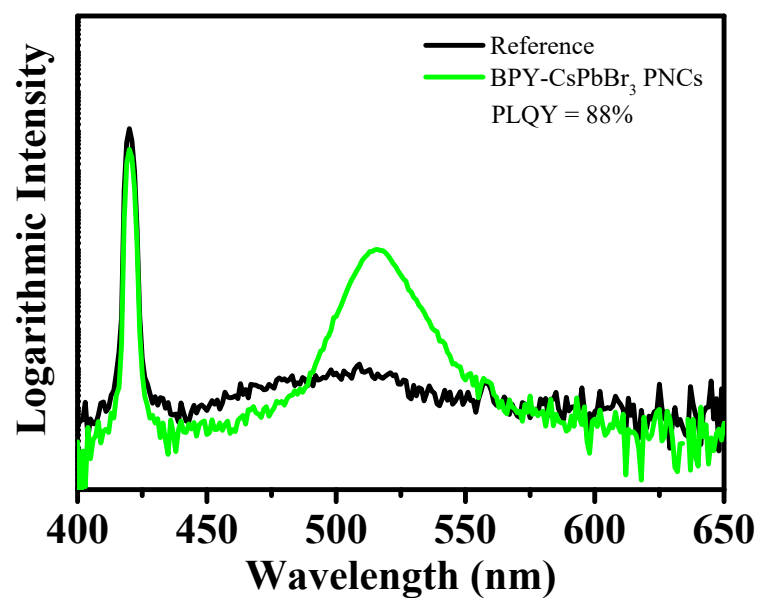

**Figure S5.** PLQY spectrum of BPY-CsPbBr<sub>3</sub> PNCs.

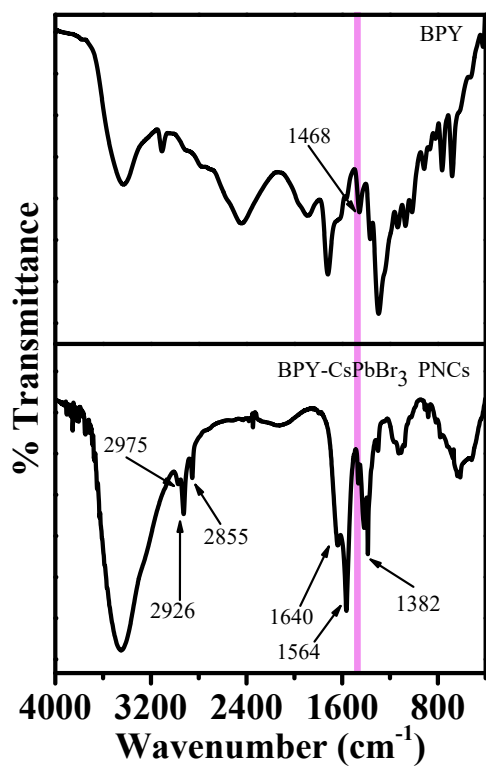

**Figure S6.** Combined FTIR spectra of BPY and BPY-CsPbBr<sub>3</sub> PNCs.

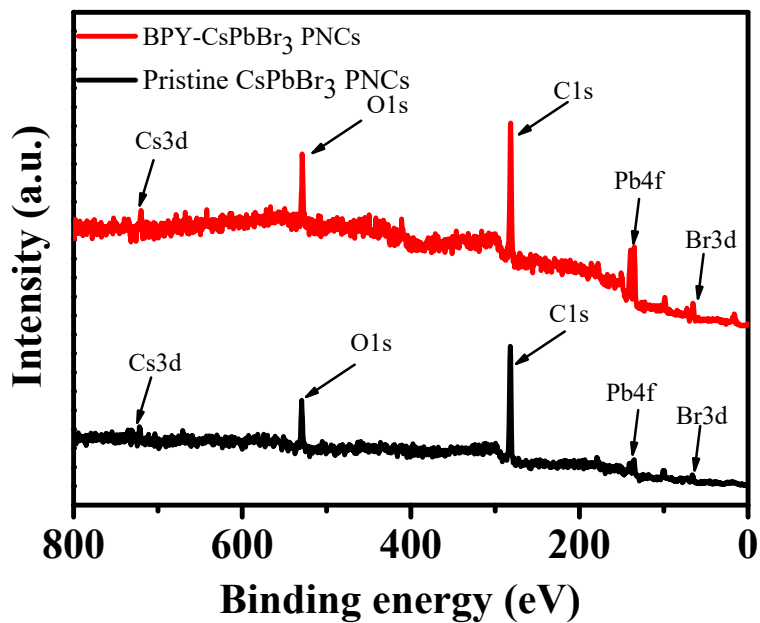

**Figure S7.** Survey spectrum of pristine CsPbBr<sub>3</sub> PNCs and BPY-CsPbBr<sub>3</sub> PNCs.

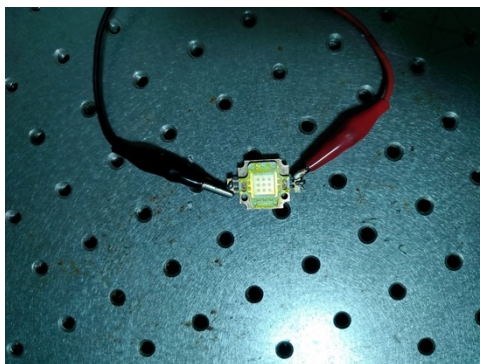

**Figure S8.** Photographs of down-converted LED under daylight.

**Table S1. List of different bidentate ligands.**

| <b>Sr. No.</b> | <b>Material used</b>                                             | <b>Bidentate ligand used</b> | <b>PLQY (%)</b>  | <b>PL stability</b>          | <b>UV stability</b>        | <b>Thermal stability</b> | <b>Reference No.</b> |
|----------------|------------------------------------------------------------------|------------------------------|------------------|------------------------------|----------------------------|--------------------------|----------------------|
| 1.             | CsPbI <sub>3</sub>                                               | IDA                          | 95               | 15 days                      | –                          | –                        | 1                    |
| 2.             | CsPbCl <sub>3</sub><br>CsPbBr <sub>3</sub><br>CsPbI <sub>3</sub> | Phthalimide                  | 5.8<br>100<br>97 | 4 months<br>1 year<br>1 week | 2 days<br>2 days<br>2 days | –<br>–<br>–              | 2                    |
| 3.             | CsPbBr <sub>3</sub>                                              | DTDB                         | 92               | –                            | 4.5 hr                     | 80°C                     | 3                    |
| 4.             | CsPbBr <sub>3</sub>                                              | Aminocaproic acid            | 59               | –                            | –                          | –                        | 4                    |
| 5.             | Mn-doped<br>CsPbCl <sub>3</sub>                                  | BPY                          | 70               | 1 month                      | 24 hr                      | 60°C                     | 5                    |
| 6.             | CsPbBr <sub>3</sub>                                              | BPY                          | 88               | 2 months                     | 24 hr                      | 60°C                     | This work            |
